1 **Title: Feasibility of a social protection linkage program for individuals at-risk for tuberculosis in**  
2 **Uganda**

3 **Authors:** Grace Nanyunja<sup>a†</sup>, Jillian L. Kadota<sup>b†</sup>, Catherine Namale<sup>a</sup>, Mollie Hudson<sup>b</sup>, Talemwa Nalugwa<sup>a</sup>,  
4 Stavia Turyahabwe<sup>c</sup>, Adithya Cattamanchi<sup>a,b,e</sup>, Achilles Katamba<sup>a,f</sup>, Prosper Muhumuza<sup>d</sup>, Priya B.  
5 Shete<sup>\*a,b</sup>

6 †These authors contributed equally to this work.

7 **Author Information:**

- 8 a. Uganda Tuberculosis Implementation Research Consortium, Kampala, Uganda  
9 b. Division of Pulmonary and Critical Care Medicine and Center for Tuberculosis, University of  
10 California San Francisco, San Francisco CA USA  
11 c. National Tuberculosis and Leprosy Program, Uganda Ministry of Health, Kampala, Uganda  
12 d. Expanded Social Protection Programme, Ministry of Gender, Labor and Social Development,  
13 Kampala Uganda  
14 e. Division of Pulmonary Diseases and Critical Care Medicine, University of California Irvine, Irvine,  
15 CA USA  
16 f. Clinical Epidemiology & Biostatistics Unit, Department of Medicine, Makerere University College  
17 of Health Sciences, Kampala, Uganda

18 **\*Corresponding Author:** E-mail: [Priya.shete@ucsf.edu](mailto:Priya.shete@ucsf.edu) (PS)

19 **Word Count:** 3507

20 **Short title:** Feasibility of social protection linkage program in Uganda

21 **Abstract Word Count:** 331

22 **Tables/Figures:** 4

23 **Keywords:** tuberculosis, diagnosis, implementation science, social protection

24 **Trial Registration:** Pan African Clinical Trials Registry (PACTR201906852160014)

25

## 26 **ABSTRACT**

27 **Introduction:** Social protection interventions have the potential to accelerate progress towards global  
28 tuberculosis (TB) targets. We piloted a screening and linkage program at four community health centers  
29 (HC) to enroll adults seeking TB diagnostic evaluation services into existing government-supported social  
30 protection programs in Uganda.

31 **Methods:** From May-December 2021, health center staff were asked to screen adults being evaluated  
32 for TB for eligibility for government-supported social protection programs, and to refer eligible people to  
33 a sub-county community development office (CDO) responsible for enrolling community members into  
34 government-supported social protection programs. Linkage was facilitated with a transportation  
35 reimbursement via mobile money and referral documentation confirming program eligibility. We assessed  
36 feasibility using programmatic data and conducted post-intervention surveys to understand experiences  
37 with the linkage program.

38 **Results:** Of 855 people undergoing TB evaluation, 655 (76%) adults met criteria for at least one  
39 government-supported social protection program. 25 (4%) of those were not interested in referral; the  
40 rest were referred to their local CDO. While 386 (61%) of the 630 participants reported to the CDO  
41 seeking social protection enrolment, only 122 (32%) of those were ultimately enrolled into a social  
42 protection scheme, representing only 19% (n=655) of those eligible. In participant surveys, among those  
43 seeking enrolment at the CDO (n=60; 65% of those surveyed), 46 (77%) were not enrolled into a social  
44 protection program. Reasons for non-enrollment were either unknown to the participant (n=25, 54%) or  
45 due to operational challenges at the CDO including a lack of human resources or available groups join  
46 in the social protection program (n=20, 43%). 61 (63%) survey participants indicated that they would not  
47 have sought social protection enrollment without the referral program.

48 **Conclusion:** Most adults seeking TB diagnostic evaluation are eligible for and interested in obtaining  
49 government-supported social protection. We found facilitated linkage from HCs to CDOs offering social  
50 protection services to be feasible, however ultimate enrollment into programs was limited. Additional

51 research is needed to identify strategies to improve access to existing social protection programs for  
52 eligible TB-affected individuals.

53

54

55

56

57

58

59

60

61

62

63

64

65

66

67

68

69

70

71

72

73

74

75

76

## 77 INTRODUCTION

78 Tuberculosis (TB) remains a major global health issue and among the leading causes of death worldwide.  
79 In 2021 alone, approximately 10.6 million people developed TB, causing almost 1.6 million deaths  
80 globally in the same year (1). It is well-recognized that TB is as much a social disease as it is infectious,  
81 with those affected representing the poorest and most vulnerable individuals in society who  
82 disproportionately live in low and middle countries (1,2). In addition to the financial vulnerabilities created  
83 by TB disease, evidence suggests that suffering from catastrophic costs due to TB, defined as costs  
84 surpassing 20% of annual household income, creates greater risk of adverse TB outcomes such as  
85 treatment failure, recurrence, and death, and perpetuates negative financial coping strategies such as  
86 dissaving, thus entrenching vulnerable individuals and households deeper into poverty and poor health  
87 (3–6).

88  
89 Recognizing the interdependence between disease, social determinants of health, and socioeconomic  
90 development(5,7), both the United Nation’s Sustainable Development Goals (SDGs)(8) and the World  
91 Health Organization’s (WHO) 2015 End TB Strategy(9) encourage the implementation of innovative  
92 multisectoral approaches to address the intersection of social determinants of health and illnesses like  
93 TB (10,11). Both highlight social protection and poverty alleviation as key strategies for addressing risk  
94 factors for acquiring TB and the economic consequences that follow its diagnosis (8,9). Social protection  
95 is defined as social and economic policies and programs that target multiple dimensions of poverty among  
96 disadvantaged groups. They function by improving access to basic services and supporting livelihoods,  
97 thereby mitigating the consequences of financial shocks for those at risk of further impoverishment  
98 (12,13). Examples include improving access to social services, assistance in the form of cash, food, or  
99 transportation vouchers, training for participation in income-generating activities, community  
100 administered savings groups, or training activities to encourage the development of human capital  
101 (13,14).

102

103 Beyond protecting vulnerable groups from deepening poverty due to ill health, there has been mounting  
104 interest in harnessing the benefits of social protection to achieve global TB elimination goals(15),  
105 particularly in Africa(14). An emerging body of evidence demonstrates the utility and effectiveness of  
106 social protection for improving TB outcomes including increasing uptake of TB services (16), reducing  
107 risk of TB treatment default and improving rates of in TB treatment success and cure (13). Unfortunately,  
108 how best to link TB affected populations to social protection programs in high HIV/TB burden, low-income  
109 settings remains unknown. The landscape of social protection in Uganda, exemplary of this context,  
110 includes a number of government-supported programs but none that include a mechanism to enroll  
111 potentially eligible individuals affected by TB (so-called “TB-sensitive” programs), nor any social  
112 protection programs that target TB patients specifically (so-called “TB-specific” programs) (**S1 Table**)(17).  
113 Limited evidence exists on how to design such programs in accordance with TB elimination strategies  
114 (9,18). This gap presents a major operational and programmatic barrier for implementing social and  
115 economic supports for TB affected populations(19,20). To address this gap, we implemented and  
116 evaluated the feasibility of a health center (HC)-based social protection linkage strategy for individuals  
117 presumed to have TB in Uganda.

118

## 119 **METHODS**

### 120 **Study setting and population**

121 In partnership with the Ministry of Health (MoH) and the Ministry of Gender, Labour and Social  
122 Development (MoGLSD) of Uganda, we piloted a program to link eligible adults seeking TB diagnostic  
123 evaluation services from four community HCs with existing government-supported social protection  
124 programs in Uganda (May to December 2021). Participating HCs were classified as Level IV HCs, where  
125 TB diagnosis and treatment services are offered and are managed by the National Tuberculosis and

126 Leprosy Programme (NTLP) within the MoH. Participating community development offices (CDO, n=10)  
127 served the same catchment area as participating HCs. CDOs are under the purview of the MoGLSD and  
128 are responsible for the local administration of government-supported social protection programs including  
129 disseminating information on existing social services locally, screening and enrolment for eligible  
130 individuals, and distributing benefits.

131

## 132 **Eligibility criteria and study population**

133 The study population included all individuals  $\geq 18$  years of age being evaluated for TB at a participating  
134 HC, defined as having submitted a sputum sample to the laboratory for TB diagnostic evaluation. After  
135 submission of their sputum sample, health center staff asked adults three questions to screen them for  
136 eligibility into any one of the seven major government-supported social protection programs included in  
137 our pilot program. This included verification that the individual: 1) lives in a participating subcounty served  
138 by one of the included CDOs; 2) is not a salaried government worker; and 3) does not already receive  
139 benefits from a government-supported social protection program.

140

## 141 **Procedures**

### 142 **Social protection program identification**

143 With key stakeholders including MoGLSD and NTLP, we landscaped the social development sector to  
144 identify active government-supported social protection programs being implemented across all regions  
145 where the pilot was taking place. We collected data on each social protection program according to target  
146 population, eligibility criteria, benefit scheme and structure, geographic catchment area, and duration of  
147 program implementation.

148

### 149 **Facilitated linkage process**

150 Procedures for social protection program facilitated linkage include steps for screening, eligibility  
151 determination, and provision of a transportation voucher and referral documentation for eligible adults to  
152 present to the local CDO. Research study staff introduced linkage procedures to each participating HC  
153 and subcounty CDO and conducted trainings with relevant personnel. At each HC, the village health  
154 team (VHT) worker responsible for screening HC clients for TB was identified to serve as the focal point  
155 for study activities. The VHT assessed all persons under evaluation for TB for eligibility for government-  
156 supported social protection programs and informed each person whether they were likely eligible for a  
157 social protection program based on results of the screening. Those likely eligible for social protection  
158 program enrollment were asked about their interest in referral; those interested were given: 1) a referral  
159 slip with a unique identifier to present to the CDO officer with sociodemographic and eligibility information,  
160 and 2) instructions on how to access the respective subcounty CDO to seek social protection program  
161 enrollment. VHTs also informed all participants that they would receive a one-time transport voucher of  
162 20,000 Ugandan Shillings (USH; ~\$5.64USD) after they presented to the CDO. At the CDO, the  
163 development officer received the participants with the referral slip bearing their unique identifier,  
164 registered them in a study screening and enrollment logbook, and then followed routine procedures for  
165 enrolling community members into government-supported social protection schemes including providing  
166 information on available schemes and prerequisites for enrolment. At the CDO, participants found eligible  
167 for one or more schemes were enrolled as per the discretion of the development officer and according to  
168 their standard operating procedures.

169

## 170 **Data collection**

### 171 **Social protection referral data collection**

172 Process metrics were abstracted from logbooks at each HC and CDO to assess implementation and  
173 enrollment outcomes (see **Outcomes**). Focal persons at each HC and CDO was identified and trained  
174 using a camera-enabled smartphone to take photos of the HC and CDO logbooks, respectively. They

175 would then upload the photos to a central secure server using the National Institutes of Health (NIH)-  
176 recommended Research Electronic Data Capture (REDCap) software mobile application (21).

177

## 178 **TB clinical data collection**

179 Full data abstraction procedures are standardized for TB diagnostic evaluation studies within the Uganda  
180 Tuberculosis Implementation Research Consortium (U-TIRC), and are described elsewhere (22). In brief,  
181 data were collected at all HCs from NTLP Presumptive TB registers, Laboratory and Treatment registers,  
182 and Xpert laboratory requisition forms. These data included key patient demographic and clinical  
183 (including HIV-related) information in addition to TB outcomes. Data quality assurance is as described  
184 previously (22). Research staff matched social protection referral data to TB register data using  
185 participant identifiers such as name and referral dates to create a linked study database which was  
186 subsequently de-identified.

187

## 188 **Survey data collection**

189 The VHT also assessed those found to be eligible for government-supported social protection programs  
190 for interest in survey participation. We randomly selected a subset of those interested for survey  
191 participation, stratified by HC and sex. We collected socioeconomic information as well as perceptions  
192 and experiences with linkage to the CDO for social protection enrollment. Surveys were conducted one  
193 month following HC referral.

194

## 195 **Outcomes**

196 Study outcomes focused on implementation outcomes that reflected the HC screening and linkage  
197 process. These outcomes included numbers and proportions of: 1) people with presumed TB screened  
198 for eligibility for study and social protection linkage criteria at the HC (screened), 2) those eligible for  
199 linkage among total screened (eligible), 3) those referred to the CDO among those eligible (referred), 4)



200 those who presented to the CDO after referral (linked), 5) those sent the 20,000 USH transport  
201 reimbursement, and 6) those ultimately enrolled into a social protection scheme (enrolled). Among those  
202 who presented to the CDO we ascertained time from referral to presentation for social protection  
203 enrollment. We additionally included TB care outcomes related to TB screening, diagnosis, and  
204 treatment.

205

## 206 **Statistical analysis**

207 We assessed patient characteristics, implementation of the pilot linkage process, TB register data, and  
208 survey results using numbers and proportions for categorical data and either median and interquartile  
209 ranges (IQR) or means with standard deviations (SD) for continuous variables. All analyses were  
210 conducted using Stata version 16 (StataCorp, TX USA).

211

212 The study protocol was approved by the institutional review boards of the University of California San  
213 Francisco, San Francisco, CA, USA, Makerere University School of Public Health, Kampala, Uganda and  
214 by the Uganda National Council for Science and Technology, Kampala, Uganda, and included a waiver  
215 of written informed consent for social protection program referral and access to routinely collected  
216 demographic and clinical information among all participants. Verbal consent was obtained for  
217 participation in surveys.

218

## 219 **RESULTS**

### 220 **Social protection program characteristics**

221 We identified seven major government-supported social protection programs being implemented across  
222 all regions where the pilot was taking place. A description of the target population and intended function  
223 and structure of benefits and geographic coverage are summarized in **S1 Table**. All programs provide

224 benefits at either the subcounty or parish level, which is the most granular administrative level in a sub-  
225 county. The majority of social protection programs were group-based, in which benefits are distributed  
226 not individually, but to a group of eligible individuals participating in the same enterprise. Most social  
227 protection programs provided benefits as loan requiring repayment with interest. Two programs  
228 distributed benefits as grants, which do not require repayment, and one program distributed agricultural  
229 inputs to land-owning beneficiaries.

230

### 231 **Feasibility of the pilot facilitated linkage process**

232 From May to December 2021, we screened 855 persons undergoing TB diagnostic evaluation at  
233 participating HCs. Among the 855 screened, we found 655 (76%) adults to be eligible per government-  
234 supported social protection program criteria. 25 (4%) of those eligible were not interested in referral and  
235 declined to participate. The remaining 630 (96%) were informed they were likely eligible for a social  
236 protection program based on results of the screening. All were referred to the CDO for further  
237 assessment. Sociodemographic and clinical information on participants referred for social protection  
238 enrollment is shown in **Table 1**. 386 (61%) of those referred were successfully linked to the sub-county  
239 CDOs and were ultimately evaluated for social protection program enrollment with a median time to  
240 linkage of 1 day (IQR: 0-4). The development officer at the CDO found 382 of the 386 (99%) participants  
241 referred for social protection enrollment to be eligible for one or more government-supported social  
242 protection program. Of the 386 total participants linked to the CDO, 362 (94%) received the transport  
243 refund. 122 (32%) of those who were linked and evaluated at the CDO were ultimately enrolled into a  
244 social protection scheme, representing only 19% of those eligible (**Fig 1**). There was substantial variation  
245 in implementation outcomes by health center (**S2 Table**).

246

247 **Table 1. Demographic and clinical characteristics of the study population across all participating**  
248 **health centers.**

| Characteristic                              | N (%) or Median (IQR) |
|---------------------------------------------|-----------------------|
| Age, Median (IQR)                           | 35 (26-48)            |
| Female sex, n (%)                           | 372 (59.0)            |
| HIV status, n (%)                           |                       |
| Positive                                    | 170 (27.0)            |
| Negative                                    | 441 (70.0)            |
| Unknown                                     | 19 (3.0)              |
| Micro-bacteriologically confirmed TB, n (%) | 36 (5.7)              |
| Treated, n (%)                              | 30 (4.8)              |
| Treatment outcome (n=30), n (%)             |                       |
| Completed                                   | 15 (42.1)             |
| Cured                                       | 10 (33.3)             |
| Lost to follow up                           | 1 (3.3)               |
| Died                                        | 3 (10.0)              |
| Transferred out                             | 1 (3.3)               |

249 CDO=community development office; IQR=interquartile range; TB=tuberculosis

250

251 **Fig 1. Linkage feasibility based on cascade of screening, referral, and enrolment into a social**  
252 **protection program.** CDO=community development office; SP=social protection. Each bar represents  
253 a necessary step in the linkage program from screening for social protection enrolment, identification of  
254 those eligible, facilitated referral for those interested in participating, linkage to the CDO, and enrolment  
255 in an available program. Reasons participants were found to be ineligible for social protection eligibility  
256 included those living in a subcounty outside of the jurisdiction of the CDO (n=134; 16% of all screened),  
257 those not meeting age requirements (n=38; 4% of all screened), those who were government workers on  
258 payroll (n=14; 2% of all screened), and those already enrolled in social protection schemes (n=14; 2% of  
259 all screened).

260

## 261 **Survey results**

262 Ninety-seven participants (median age was 38 years (IQR: 26-48); 57 (59%) were female) responded to  
 263 our survey. Over half (n=49; 51%) of the participants were multidimensionally impoverished or severely  
 264 multidimensionally impoverished based on the Multidimensional Poverty Index (MPI) (22). Dissaving due  
 265 to the economic impact of TB was common; 74% (n=72) used personal or household savings, 51% (n=50)  
 266 reduced household food intake, 41% (n=40) sold an asset, and 40% (n=39) took out a loan to cover costs  
 267 associated with their current episode of illness (**Table 2**). Unmet social needs were also commonly  
 268 reported; 70% (n=68) of participants had food insecurity, 39% (n=38) lacked reliable transport to the HC,  
 269 and 80 participants (82%) indicated that it was difficult to pay or find basic needs such as food, housing,  
 270 and medical care (**Table 3**).

271

272 **Table 2. Household and individual characteristics of survey participants.**

|                                             | <b>N (%), Mean (SD), or<br/>Median (IQR)</b> |
|---------------------------------------------|----------------------------------------------|
| <b>Total surveys</b>                        | 97                                           |
| <b>Age (Median, IQR)</b>                    | 38 (26-48)                                   |
| <b>Female sex</b>                           | 57 (58.8)                                    |
| <b>Multidimensional Poverty Index</b>       |                                              |
| Not poor/not vulnerable                     | 17 (17.5)                                    |
| Vulnerable to poverty                       | 31 (32.0)                                    |
| Impoverished                                | 34 (35.1)                                    |
| Severely impoverished                       | 15 (15.5)                                    |
| <b>Participant is head of household</b>     | 62 (63.9)                                    |
| <b>Participant is not currently working</b> | 19 (19.6)                                    |
| <b>Education level</b>                      |                                              |
| None                                        | 6 (6.2)                                      |
| Primary level                               | 62 (63.9)                                    |
| Secondary level                             | 25 (25.8)                                    |

|                                                  |           |
|--------------------------------------------------|-----------|
| Tertiary level                                   | 4 (4.1)   |
| <b>Household size (Mean, SD)</b>                 | 5.8 (2.9) |
| <b>Participant has a functional bank account</b> | 19 (19.6) |

273 IQR=interquartile range; SD=standard deviation

274

275 We compared self-reported data regarding social protection program referral, linkage and enrollment  
 276 between HC and CDO logbooks. All survey participants (n=97) were found eligible for CDO referral.  
 277 However, four survey participants did not realize they had been found eligible and were referred to the  
 278 CDO for social protection enrollment. 64% (n=9/14) of those who thought they were enrolled into a  
 279 scheme by the CDO had not been upon CDO logbook review, while 8 of those who were indeed enrolled  
 280 into a social protection scheme according to CDO logbook data did not know that they had been enrolled.  
 281 The majority (n=25; 54%) of those not enrolled into a program did not know the reason for why they were  
 282 not enrolled (**Fig 1**). 63% (n=61) of survey participants indicated that they would have not sought out a  
 283 social protection program without this linkage program.

284

285 **Table 3. Negative financial consequences and unmet social needs among individuals presumed**  
 286 **to have TB (n=97).**

| <b>Economic impact of TB</b>                 | <b>N (%)</b> |
|----------------------------------------------|--------------|
| <b><i>Dissaving</i></b>                      |              |
| Used personal or household savings           | 72 (74.2)    |
| Reduced household food intake                | 50 (51.6)    |
| Sold an asset                                | 40 (41.2)    |
| Took out a loan                              | 39 (40.2)    |
| Took a child out of school                   | 7 (7.2)      |
| <b><i>Unmet social needs</i></b>             |              |
| <b>In past 1 month:</b>                      |              |
| Worried food would run out (sometimes/often) | 68 (70.1)    |

Lack of reliable transportation kept from: health facilities, work, market, or from getting things needed for daily living 38 (39.2)

Been to a place where free food is distributed 14 (14.4)

***Current living situation***

Steady place to live 57 (58.8)

Steady place to live, but worried will lose it 37 (38.1)

No steady place to live 2 (2.1)

Missing living situation 1 (1.0)

***Difficulty in paying/finding basic food/housing/medical care***

Somewhat difficult 69 (71.1)

Not difficult at all 17 (17.5)

Very difficult 11 (11.3)

287 TB=tuberculosis. Participants in the pilot social protection linkage program randomly selected to  
288 participant in a survey described persistent social and financial challenges during their illness.  
289

290 **DISCUSSION**

291 Innovative, multisectoral approaches are urgently needed in order to reach the ambitious global public  
292 health goal of ending TB. We sought to evaluate the acceptability and feasibility of a program in which  
293 we facilitated the linkage of people with presumed TB from community health centers to local community  
294 development offices for enrollment into government-supported social protection programs. Our results  
295 suggest this linkage program was highly acceptable, with 92% of those eligible interested in the referral  
296 program, as well as technically feasible, with 99% of participants linked from the HC subsequently  
297 confirmed to be eligible for one or more government-supported social protection program. Our program  
298 delivered transportation vouchers with high fidelity; 94% of those who sought social protection enrolment  
299 at the CDO successfully received their mobile money. Our results also suggest that this social protection  
300 linkage program addressed an important need: 63% of surveyed participants (n=61) felt that the program  
301 facilitated access to social protection benefits that they might otherwise not have sought out. Despite

302 feasibility and acceptability of this health system-based linkage process, ultimate enrollment into  
303 programs was limited. Among the 382 total eligible persons linked to CDOs, only 122 were enrolled into  
304 a program, representing less than 20% (n=655) of those who were eligible to receive social protection  
305 benefits.

306

307 Our study demonstrates individuals with presumed TB are exceedingly socioeconomically vulnerable,  
308 with high levels of impoverishment and unmet social needs. Over half of our participants were classified  
309 as either impoverished or severely impoverished based on a validated quantitative measure, the MPI.  
310 Surveys revealed many participants engaged in negative financial coping strategies, called dissaving, in  
311 order manage the costs of TB associated care seeking and symptoms: 40% of participants took out a  
312 loan, 41% sold an asset, 52% reduced household food intake, and 74% used personal or household  
313 savings (**Table 3**). Most surveyed participants reported unmet social needs, including 82% who indicated  
314 they faced difficulties in accessing basic needs and services including food, housing, and medical care.  
315 In the month prior to participating in our surveys, over 70% of participants were worried that their food  
316 source would run out, with 14% of respondents having been to a place where free food is distributed.  
317 These results are in keeping with the large literature citing the social and economic consequences of TB  
318 (3,6,23). Unfortunately, while 76% of individuals being evaluated for TB related symptoms were eligible  
319 for social protection programs, less than 20% were enrolled, representing a major gap in social protection  
320 service delivery for this vulnerable population.

321

322 Several implementation challenges likely contributed to the substantial attrition of participants from the  
323 time of referral at the health center to social protection program enrolment. Distance between the HC and  
324 CDO and/or associated time and opportunity costs for additional visits to a government office may not  
325 have been overcome by our transportation vouchers for all participants. Among those that reached the  
326 CDO but were not enrolled in a social protection program, attrition was largely due to unpredictable  
327 closures at the CDO and a lack of available development staff. Even after linkage to a development office,

328 our survey results revealed that 20% of eligible participants faced systems barriers to enrollment,  
329 including strict limitations to enrollment based on the terms and structure of government-supported  
330 programs. In most Ugandan social protection or development programs, eligible clients are required to  
331 either form or join groups of 7 or more other eligible clients prior to being enrolled. Although requirement  
332 for group formation is likely intended to mitigate financial risk for the program and support community  
333 building, it presented a formidable barrier to enrollment for our study participants who are often left to  
334 navigate these complex terms on their own. Finally, we found evidence of knowledge and communication  
335 barriers among participants. Over half of survey participants indicated that they were not told the reason  
336 for why they were not enrolled into a social protection program. Other discrepancies were also noted: 8  
337 survey participants whose logbook data reflected social protection program enrollment reported that they  
338 were not enrolled, while 9 participants self-reported that they were enrolled into a program when logbook  
339 data indicated that they were not. This mismatch may reflect a breakdown in communication and lack of  
340 understanding among community members of the process of receiving social protection benefits. These  
341 results also highlight the importance of optimizing performance for social protection programs as a pre-  
342 requisite for successful implementation and scale up of sustainable multi-sectoral linkage programs that  
343 address the social and economic determinants of TB.

344

345 As with most pilot programs, our approach has several potential limitations. First, we did not include  
346 informal, community-based social protection programs that are common in Uganda, including saving  
347 circles or loans from faith-based organizations, nor did we include large social protection programs  
348 administered and funded by multilateral or bilateral implementing partners in our linkage program. We  
349 chose not to include these programs as they were not government funded and thus had less likelihood  
350 for sustainable scale-up. Future research may consider the impact that access to such programs may  
351 have on TB outcomes. Additionally, we observed high levels of heterogeneity in screening, eligibility, and  
352 enrollment across participating HCs (**S2 Table**) but were unable to explain the reason behind these  
353 differences with our study data alone. Additional research including interviews with health center staff



354 and CDO officers will be necessary to gain a better understanding for the differences we saw in program  
355 eligibility and enrollment across health centers, as well as the supply and demand mismatch we observed  
356 in access to social protection programs for eligible TB-affected individuals overall.

357

358 The main strength of our study stems from our early partnership and collaboration with both the  
359 NTLP/Ministry of Health and the Expanded Social Protection Programme within the MoGLSD. Engaging  
360 a key governmental partner outside of the health sector with the mandate for provision of social protection  
361 programs enabled our study to co-design our implementation strategy, collect essential process metrics,  
362 and leverage ongoing programs in our approach. Our focus on implementation outcomes provides a  
363 simple and systematic approach to measure social protection program coverage and attrition in services  
364 for eligible TB-affected individuals which may be replicated in other similar settings. Finally, our use of  
365 explanatory surveys provides some crucial insights into key gaps in the linkage process, while also  
366 highlighting barriers and facilitators that will support the development of improved linkage strategies and  
367 metrics to foster multisectoral accountability, an approach highlighted as critical for reaching END TB  
368 targets (20).

369

370 While all government-supported social protection programs that were included in this study could be  
371 considered TB-sensitive, in that although not directly targeting TB-affected patients their effects could  
372 have downstream impacts on TB-related outcomes and mitigate the financial consequences of disease  
373 (19), the challenges with even facilitated linkage to such programs suggests that an improved strategy  
374 for reaching vulnerable TB affected individuals is required. Like other high-burden and low-income  
375 countries, no government-supported social protection programs are available to Ugandans with TB  
376 specifically on the basis of their TB status. Given the recent growing interest in the use of social protection  
377 and other multisectoral approaches to improve outcomes for TB-affected households in Uganda (20) and  
378 in other similar contexts (13,24), policy makers and stakeholders should consider collaborating to improve

379 program performance for those eligible and/or expanding the types of social development and social  
380 protection programs available for individuals and households affected by TB.

381

## 382 **CONCLUSIONS**

383 Individuals at risk for TB in this high-burden, low-income setting are extremely socioeconomically  
384 vulnerable and, unfortunately, not covered by government-supported social protection programs despite  
385 eligibility and interest. A health center based social protection linkage program for individuals presumed  
386 to have TB, in partnership with community development offices, while acceptable and technically feasible,  
387 has marginal impact due to implementation barriers to enrollment within the development sector.  
388 Additional research is needed to identify optimal ways of enhancing access to essential social protections  
389 for this vulnerable population.

390

391

392

393

394

395

396

397

398

399

400

401

402

403

## 404 **ACKNOWLEDGEMENTS**

405 The authors are grateful to the administration, staff, and patients at the participating health centers for  
406 their time and participation, the staff and administration for the participating community development  
407 offices, the research administration of the Uganda TB Implementation Research Consortium, the  
408 Expanded Social Protection Programme within the Ministry of Labour, Gender, and Social Development,  
409 and the National Tuberculosis and Leprosy Program.

410

411

412

413

414

415

416

417

418

419

420

421

422

423

424

425

426

427

428

## 429 REFERENCES

- 430 1. World Health Organization. Global tuberculosis report 2022 [Internet]. Geneva: World Health  
431 Organization; 2022 [cited 2022 Dec 2]. Available from:  
432 <https://apps.who.int/iris/handle/10665/363752>
- 433 2. Wingfield T, Tovar MA, Datta S, Saunders MJ, Evans CA. Addressing social determinants to end  
434 tuberculosis. *Lancet*. 2018 Mar 24;391(10126):1129–32.
- 435 3. Tanimura T, Jaramillo E, Weil D, Raviglione M, Lönnroth K. Financial burden for tuberculosis  
436 patients in low- and middle-income countries: a systematic review. *Eur Respir J*. 2014  
437 Jun;43(6):1763–75.
- 438 4. Wingfield T, Boccia D, Tovar M, Gavino A, Zevallos K, Montoya R, et al. Defining catastrophic costs  
439 and comparing their importance for adverse tuberculosis outcome with multi-drug resistance: a  
440 prospective cohort study, Peru. *PLoS Med*. 2014 Jul;11(7):e1001675.
- 441 5. Saunders MJ, Evans CA. Fighting poverty to prevent tuberculosis. *Lancet Infect Dis*. 2016  
442 Apr;16(4):395–6.
- 443 6. Ukwaja KN, Modebe O, Igwenyi C, Alobu I. The economic burden of tuberculosis care for patients  
444 and households in Africa: a systematic review. *Int J Tuberc Lung Dis*. 2012 Jun;16(6):733–9.
- 445 7. Dye C, Lönnroth K, Jaramillo E, Williams BG, Raviglione M. Trends in tuberculosis incidence and  
446 their determinants in 134 countries. *Bull World Health Organ*. 2009 Sep;87(9):683–91.
- 447 8. Sustainable Development Goals [Internet]. United Nations; Available from:  
448 <https://www.un.org/sustainabledevelopment/>
- 449 9. The End TB Strategy: Global strategy and targets for tuberculosis prevention, care and control after  
450 2015. World Health Organization; 2014.
- 451 10. Lönnroth K, Raviglione M. The WHO's new End TB Strategy in the post-2015 era of the  
452 Sustainable Development Goals. *Trans R Soc Trop Med Hyg*. 2016 Mar;110(3):148–50.
- 453 11. Uplekar M, Weil D, Lönnroth K, Jaramillo E, Lienhardt C, Dias HM, et al. WHO's new end TB  
454 strategy. *Lancet*. 2015 May 2;385(9979):1799–801.
- 455 12. Hargreaves JR, Boccia D, Evans CA, Adato M, Petticrew M, Porter JDH. The social determinants of  
456 tuberculosis: from evidence to action. *Am J Public Health*. 2011 Apr;101(4):654–62.
- 457 13. Andrade KVF de, Nery JS, Souza RA de, Pereira SM. Effects of social protection on tuberculosis  
458 treatment outcomes in low or middle-income and in high-burden countries: systematic review and  
459 meta-analysis. *Cad Saude Publica*. 2018 Feb 5;34(1):e00153116.
- 460 14. Adato M, Hoddinott J. Social protection: Opportunities for Africa. International Food Policy  
461 Research Institute (IFPRI); 2008.
- 462 15. Social protection: A development priority in the post-2015 UN development agenda. ECA, ILO\*,  
463 UNCTAD, UNDESA, UNICEF; 2012 May.

- 464 16. Volmink J, Garner P. Systematic review of randomised controlled trials of strategies to promote  
465 adherence to tuberculosis treatment. *BMJ*. 1997 Nov 29;315(7120):1403–6.
- 466 17. Lönnroth K, Glaziou P, Weil D, Floyd K, Uplekar M, Raviglione M. Beyond UHC: monitoring health  
467 and social protection coverage in the context of tuberculosis care and prevention. *PLoS Med*. 2014  
468 Sep;11(9):e1001693.
- 469 18. NATIONAL STRATEGIC PLAN FOR TUBERCULOSIS AND LEPROSY CONTROL 2020/21 –  
470 2024/25. Uganda: National TB and Leprosy Control Program; 2020.
- 471 19. Boccia D, Pedrazzoli D, Wingfield T, Jaramillo E, Lönnroth K, Lewis J, et al. Towards cash transfer  
472 interventions for tuberculosis prevention, care and control: key operational challenges and research  
473 priorities. *BMC Infect Dis*. 2016 Jun 21;16:307.
- 474 20. NATIONAL MULTISECTORAL ACCOUNTABILITY FRAMEWORK TO ACCELERATE PROGRESS  
475 TO END TUBERCULOSIS BY 2030 (MAF-TB). Uganda: National TB and Leprosy Control  
476 Program; 2020.
- 477 21. Harris PA, Taylor R, Thielke R, Payne J, Gonzalez N, Conde JG. Research electronic data capture  
478 (REDCap)--a metadata-driven methodology and workflow process for providing translational  
479 research informatics support. *J Biomed Inform*. 2009 Apr;42(2):377–81.
- 480 22. Reza TF, Nalugwa T, Farr K, Nantale M, Oyuku D, Nakaweesa A, et al. Study protocol: a cluster  
481 randomized trial to evaluate the effectiveness and implementation of onsite GeneXpert testing at  
482 community health centers in Uganda (XPEL-TB). *Implement Sci*. 2020 Apr 21;15(1):24.
- 483 23. Muttamba W, Tumwebaze R, Mugenyi L, Batte C, Sekibira R, Nkolo A, et al. Households  
484 experiencing catastrophic costs due to tuberculosis in Uganda: magnitude and cost drivers. *BMC*  
485 *Public Health*. 2020 Sep 16;20(1):1409.
- 486 24. Making universal social protection a reality for people living with, at the risk of, and affected by HIV  
487 or tuberculosis. International Labour Organization; 2021.
- 488 25. Youth Livelihood Programme (YLP) Programme Document. Kampala, Uganda: Ministry of Gender,  
489 Labour and Social Development; 2013 Dec.
- 490 26. Uganda Women Entrepreneurship Programme (UWEP) Programme Document. Kampala, Uganda:  
491 Ministry of Gender, Labour and Social Development; 2019 May.
- 492 27. Revised Guidelines for the Implementation of the Uganda Women Entrepreneurship Programme  
493 (UWEP) Programme. Kampala, Uganda: Ministry of Gender, Labour and Social Development; 2019  
494 May.
- 495 28. Presidential Initiative on Wealth and Job Creation (Emyooga) Draft Operational Guidelines.  
496 Kampala, Uganda: Ministry of Finance, Planning and Economic Development;
- 497 29. Implementation Guidelines for the Parish Development Model. Kampala, Uganda: Ministry of Local  
498 Government; 2022 Feb.

- 499 30. The Senior Citizens Grant (SCG) Stakeholders' Handbook: How SAGE Works in the Community.  
500 Kampala, Uganda: Expanding Social Protection Programme, Ministry of Gender, Labour and Social  
501 Development; 2022 May.
- 502 31. Guidelines on the Special Grant for Persons with Disabilities. Kampala, Uganda: Ministry of  
503 Gender, Labour and Social Development; 2020 Jan.
- 504 32. Operation Wealth Creation [Internet]. Available from: <https://owc.go.ug/index.html>  
505  
506  
507  
508  
509  
510  
511  
512  
513  
514  
515  
516  
517  
518  
519  
520  
521  
522  
523  
524  
525

526  
527  
528  
529  
530  
531  
532  
533  
534  
535  
536  
537  
538  
539  
540  
541  
542  
543  
544  
545  
546  
547  
548  
549  
550

## **SUPPORTING INFORMATION**

**S1 Table. Characteristics and dates of implementation of government-supported social protection programs included in the linkage program.** Characteristics reflect data collected in May-December 2021.

**S2 Table. Screening and referral metrics among linked participants by health center.**  
CDO=community development office; HC=health center; IQR=interquartile range

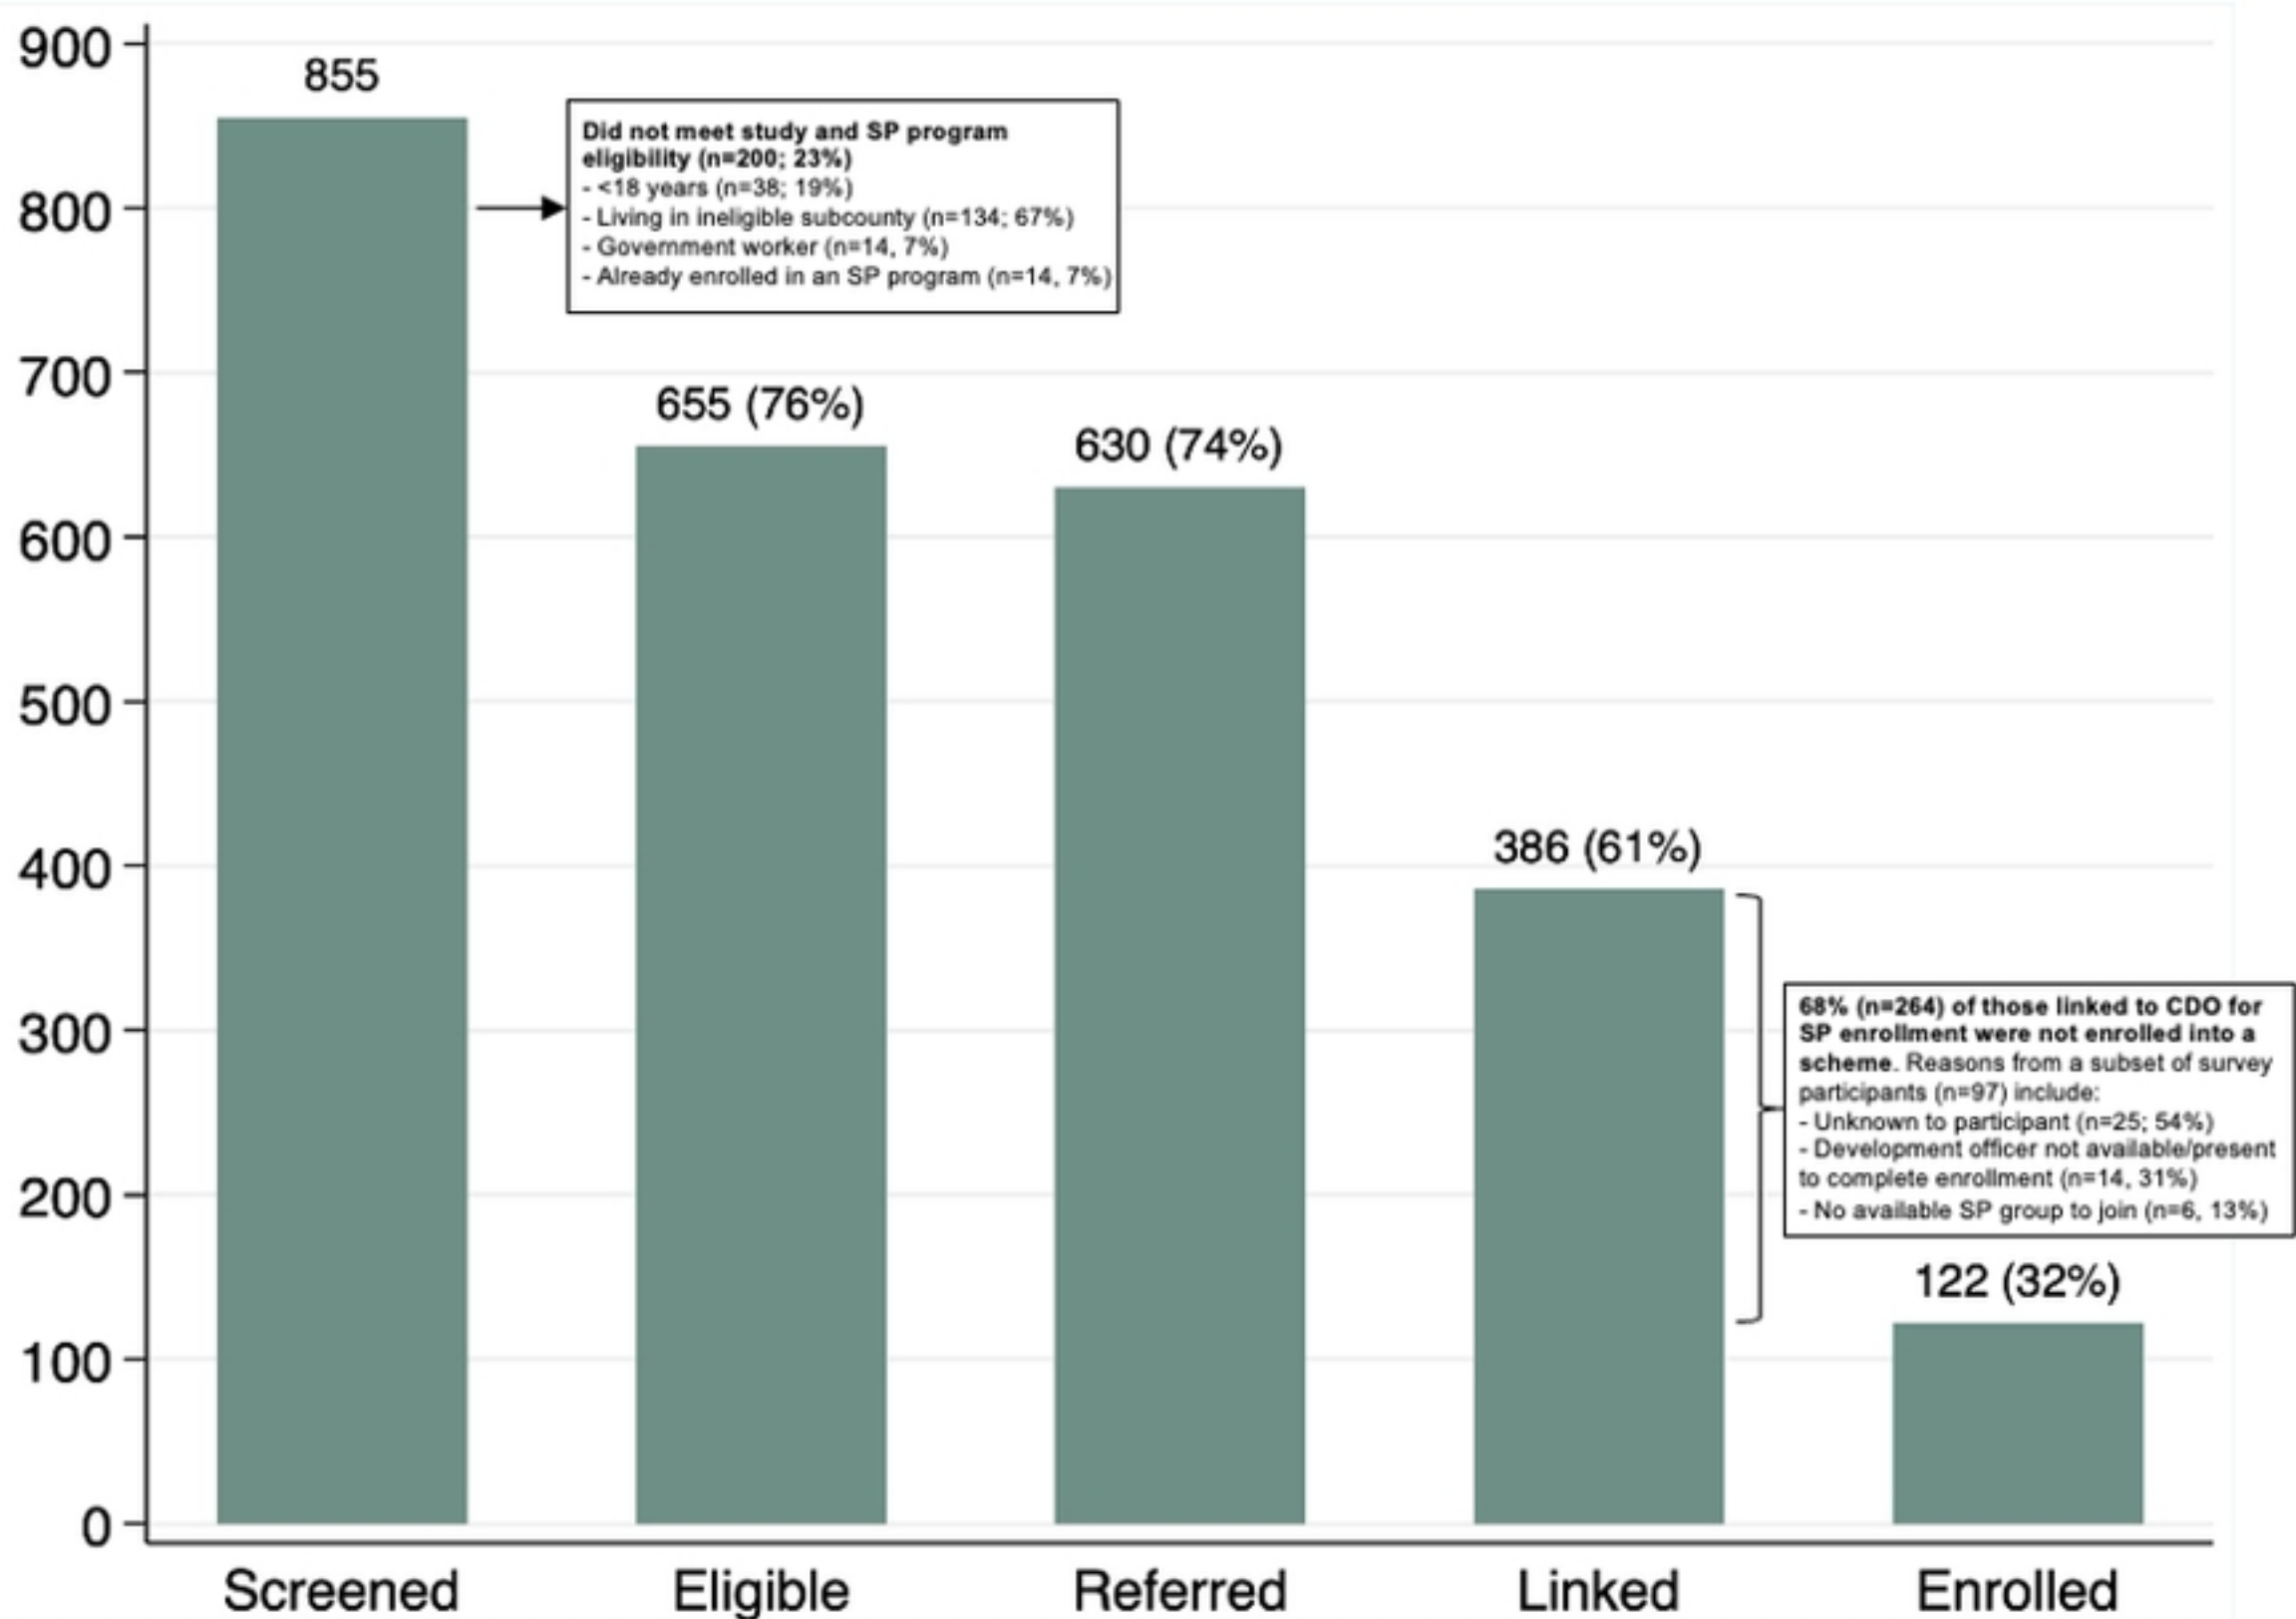

Figure
